# Supplementary material for: Access, Utilization, and Quality of Behavioral Health Integration in Medicaid Managed Care
Source: PubMed Central journal article supplement (PMC10755612; doi:10.1001/jamahealthforum.2023.4593), 2023-12-28
Supplement: jamahealthforum-e234593-s002.pdf [file jamahealthforum-e234593-s002.pdf]

## **Data Sharing Statement**

### **Data**

**Data available:** No

### **Additional Information**

**Explanation for why data not available:** Data are obtained from the State of Washington with Data Use Agreement and we are not permitted to make data available independently.
